# Supplementary material
Source: Springer Nature journal article supplement (https://www.springermedizin.de/resource/supplementary/12990_2007_99_MOESM3_ESM.pdf/9612564)

# Structural measures

## A. Chronic back pain

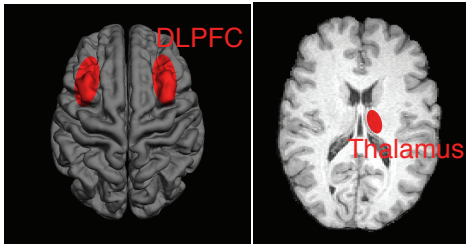

## B. Fibromyalgia

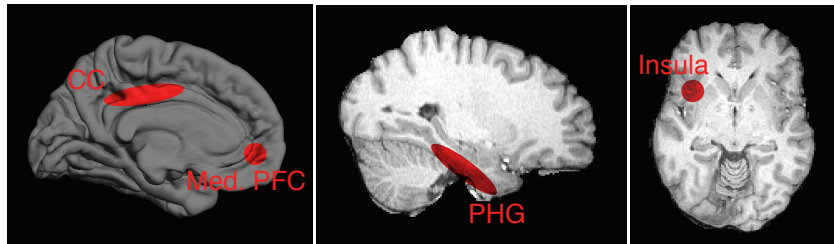

Supplement: MOESM3 [file 9612564]
